## Correction

# Correction: Isolation, Cytotoxicity Evaluation and HPLC-Quantification of the Chemical Constituents from *Prangos pabularia*

## The PLOS ONE Staff

The affiliation for the fifth author, Javid Ahmad Banday, is incorrect. Javid Ahmad Banday's correct affiliation is "Department of Chemistry, National Institute of Technology, Srinagar 190006, India".

## Reference

1. Farooq S, Shakeel-u-Rehman, Dangroo NA, Priya D, Banday JA, et al. (2014) Isolation, Cytotoxicity Evaluation and HPLC-Quantification of the Chemical Constituents from *Prangos pabularia*. PLoS ONE 9(10): e108713. doi:10.1371/journal.pone.0108713

---

**Citation:** The PLOS ONE Staff (2014) Correction: Isolation, Cytotoxicity Evaluation and HPLC-Quantification of the Chemical Constituents from *Prangos pabularia*. PLoS ONE 9(12): e115110. doi:10.1371/journal.pone.0115110

**Published:** December 3, 2014

**Copyright:** © 2014 The PLOS ONE Staff. This is an open-access article distributed under the terms of the Creative Commons Attribution License, which permits unrestricted use, distribution, and reproduction in any medium, provided the original author and source are credited.
